# Supplementary material for: The Natural Variation in Lifespans of Single Yeast Cells Is Related to Variation in Cell Size, Ribosomal Protein, and Division Time
Source: PLoS One. 2016 Dec 1;11(12):e0167394. doi: 10.1371/journal.pone.0167394 (PMC5132237; doi:10.1371/journal.pone.0167394)
Supplement: S1 File — Table a: The cell sizes in μm2 of the first dataset analyzed (119 cells total, experiments 1–6). Table b: Corresponding time measurements to cells in Table a. Table c: The cell sizes in μm2 sizes of the second dataset (106 cells total, experiments 7–9). Table d: Corresponding time measurements to cells in Table c. Table e: Average fluorescence intensity data of Rpl13A-GFP for each cell at each replicative age from the second dataset (106 cells total, experiments 7–9). (XLSX) [file pone.0167394.s005.xlsx]

## Sheet: readme
S1. File. Data on cell sizes, average fluorescence intensity and corresponding time measurements.
Table a: The cell sizes in µm2 of the first dataset analyzed (119 cells total, experiments 1-6).
Table b: Corresponding time measurements to cells in Table1.
Table c: The cell sizes in µm2 sizes of the second dataset (106 cells total, experiments 7-9).
Table d: Corresponding time measurements to cells in Table 3.
Table e: Average fluorescence intensity data of Rpl13A-GFP for each cell at each replicative age from the second dataset (106 cells total, experiments 7-9).

## Sheet:  Table a
	Experiment_1	Experiment_1	Experiment_1	Experiment_1	Experiment_1	Experiment_1	Experiment_1	Experiment_1	Experiment_1	Experiment_1	Experiment_2	Experiment_2	Experiment_2	Experiment_2	Experiment_2	Experiment_2	Experiment_2	Experiment_2	Experiment_2	Experiment_2	Experiment_2	Experiment_2	Experiment_2	Experiment_2	Experiment_2	Experiment_2	Experiment_2	Experiment_2	Experiment_2	Experiment_3	Experiment_3	Experiment_3	Experiment_3	Experiment_3	Experiment_3	Experiment_3	Experiment_3	Experiment_3	Experiment_3	Experiment_3	Experiment_3	Experiment_3	Experiment_4	Experiment_4	Experiment_4	Experiment_4	Experiment_4	Experiment_4	Experiment_4
	cell_1.1	cell_1.2	cell_1.3	cell_1.4	cell_1.5	cell_1.6	cell_1.7	cell_1.8	cell_1.9	cell_1.10	cell_1.11	cell_1.12	cell_1.13	cell_1.14	cell_1.15	cell_1.16	cell_1.17	cell_1.18	cell_1.19	cell_1.20	cell_1.21	cell_1.22	cell_1.23	cell_1.24	cell_1.25	cell_1.26	cell_1.27	cell_1.28	cell_1.29	cell_1.30	cell_1.31	cell_1.32	cell_1.33	cell_1.34	cell_1.35	cell_1.36	cell_1.37	cell_1.38	cell_1.39	cell_1.40	cell_1.41	cell_1.42	cell_1.43	cell_1.44	cell_1.45	cell_1.46	cell_1.47	cell_1.48	cell_1.49
1	14.3907	13.0968	17.9982	13.1752	12.1949	17.6453	14.4692	19.8804	10.4696	15.4495	16.3513	17.5179	16.018	20.1843	17.3022	13.3222	19.2628	17.1062	16.0474	21.9586	23.3212	17.5473	13.5183	14.8613	16.8121	17.812	21.194	17.91	17.1356	17.5081	16.5474	17.9688	14.479	13.3908	20.1157	16.3415	15.5083	14.43	19.3216	10.2539	14.9005	14.3711	15.8655	25.3238	13.323	19.9336	14.34	15.0519	16.3741
2	20.547	14.6652	16.5082	14.0378	12.9399	18.1159	16.1553	19.0962	13.4105	17.7238	15.8318	18.8119	15.6259	22.5958	18.4786	16.7435	18.5668	17.5277	17.1258	21.9096	21.7234	20.4196	17.4689	14.9985	16.5866	17.7826	21.792	20.6941	17.4199	16.665	16.8611	19.851	18.3217	12.1263	21.4783	21.1254	14.9103	12.7537	20.3411	13.5379	15.773	14.7535	15.4587	30.5107	16.6792	21.4592	16.3741	16.9843	18.4081
3	19.0962	15.371	17.763	15.4495	14.1555	21.9978	15.2534	18.9393	12.6654	17.4101	14.7731	18.3609	15.1554	22.3704	18.5374	18.1061	23.0958	19.8902	18.2531	21.6743	23.3114	18.7139	14.7142	21.145	17.2434	19.6255	23.1448	18.6452	18.7629	18.1551	16.4886	16.8121	14.0084	17.3316	15.5965	20.7529	17.8708	16.2533	16.9395	13.1654	15.0868	13.9006	14.1366	30.6124	21.866	21.7643	16.6792	20.0353	19.5268
4	22.6252	15.4103	18.7825	17.763	15.5279	21.9194	19.6843	20.2725	13.4497	20.8999	17.4297	19.851	16.7435	21.2822	20.1745	16.7729	23.5467	23.9584	20.9097	28.0071	25.321	20.4686	15.9886	18.6452	20.5176	23.0762	24.0761	19.6843	18.5766	16.1161	14.2829	22.6841	22.7821	18.0276	17.4885	21.8606	24.7917	14.7142	17.91	14.43	15.9102	17.2532	24.0017	40.2741	16.4758	21.3575	18.6115	19.8319	20.137
5	23.4487	18.1159	20.351	20.6254	18.9001	21.292	18.9393	20.4294	13.9594	22.6644	19.8314	21.0175	20.1353	26.3504	26.5366	19.8804	24.1741	22.9389	19.9098	24.4682	25.5563	21.5959	16.2729	19.5079	19.057	22.1449	24.3408	19.4883	18.1257	17.8512	19.4491	19.3412	18.2139	16.0965	19.8902	23.4095	22.4586	15.0181	21.4391	13.4889	15.7534	16.2337	26.5443	40.8843	20.0353	22.0694	18.7132	19.8319	21.0524
6	25.5661	19.253	20.8999	17.9198	16.4298	22.39	18.9001	20.547	14.9005	23.2134	17.6257	21.7234	16.5278	26.1543	24.3015	22.7135	24.8701	22.7331	21.1744	23.5369	26.0367	20.9391	17.9492	17.6159	21.8606	20.8313	26.615	18.6746	19.7628	20.3509	18.3413	20.0078	20.0961	18.5668	19.8412	22.7429	19.9196	17.6649	21.8116	13.6653	18.0865	14.7044	29.1885	48.7153	21.6626	24.6119	20.2387	19.5268	23.4932
7	24.0761	17.5277	25.0172	21.2136	17.959	25.5661	20.8215	20.6646	20.1157	24.1545	16.7925	22.8017	16.7631	26.3111	24.6937	16.3906	26.0955	23.3605	19.3805	21.988	30.3108	22.3606	16.0376	20.4588	18.9785	20.1255	24.9289	19.8902	20.2921	NA	23.0468	23.5663	24.6642	19.3805	21.5861	30.8107	20.5274	17.6257	22.1841	15.3122	20.2823	17.0768	28.68	55.9362	24.2051	28.0698	21.7643	19.8319	22.3745
8	28.9384	19.1354	29.2913	21.7234	18.1943	NA	20.8607	26.0367	20.0373	23.7232	16.5964	23.8702	16.469	28.4678	27.4385	20.547	27.3993	26.0955	22.8801	30.6637	27.0464	26.0073	18.9001	20.498	21.2822	22.9487	25.2916	21.096	22.2429	NA	28.4384	21.694	24.6642	26.7033	25.5073	25.6151	19.6843	24.5074	23.184	15.7828	20.4	20.6744	31.3243	63.3605	24.917	26.4426	22.1711	25.8324	24.2051
9	33.7222	19.057	63.7193	23.1742	21.8018	NA	23.2526	23.4879	22.4292	25.6838	17.4493	24.6054	17.1846	27.3307	28.9187	21.2724	20.4392	NA	20.1647	29.85	23.7722	25.6151	18.1355	23.684	23.4291	25.1544	23.8212	26.2033	20.3019	NA	55.5436	21.9096	29.3893	19.9294	26.7817	26.6543	27.6345	NA	25.772	22.1057	20.2039	19.9	33.7651	68.5473	25.2221	26.9511	21.3575	25.4255	23.9
10	28.311	21.3313	NA	24.2721	22.0371	NA	23.684	23.4879	21.2528	29.5265	20.0765	23.8016	19.106	27.7424	26.9287	24.6642	23.9094	NA	24.1349	31.0264	31.1244	28.1345	20.0765	22.2821	24.3604	27.7326	26.0563	24.6741	22.8997	NA	NA	26.6641	23.5663	25.6445	23.3605	22.9683	22.7135	NA	23.8408	16.1357	20.8215	20.7039	44.4439	73.7341	25.2221	29.697	25.1204	22.6796	24.4085
11	25.0564	17.8806	NA	25.5269	24.1153	NA	NA	25.8798	23.8408	31.095	20.2921	26.6641	19.3216	26.9483	28.4776	26.0759	25.8994	NA	26.5366	33.928	29.3501	26.1641	16.7925	21.0077	25.0564	23.2134	28.2031	NA	23.7428	NA	NA	27.1738	26.6052	20.7431	25.9092	23.1938	24.7917	NA	25.7622	19.5079	19.9098	24.4878	NA	NA	28.4766	26.4426	25.8324	25.3238	24.5102
12	25.0172	21.5665	NA	26.2327	NA	NA	NA	25.8014	23.135	31.0166	19.5079	27.5267	20.8313	29.1344	26.6641	26.0759	25.0368	NA	23.9192	33.8398	32.4184	25.4975	20.0471	NA	23.9976	24.3211	24.8995	NA	25.4191	NA	NA	30.2911	25.2426	23.7624	28.7815	22.4586	24.2917	NA	25.7916	19.2432	26.1249	23.5173	NA	NA	30.5107	28.5783	27.3579	31.0192	29.2902
13	23.3311	20.2333	NA	24.5466	NA	NA	NA	NA	24.5466	31.5263	20.1059	28.5756	20.3902	28.8109	26.1151	24.5074	37.5159	NA	25.5661	32.5164	33.4771	28.4678	21.6351	NA	22.7527	26.5464	31.5361	NA	23.6447	NA	NA	27.3405	26.3798	27.5659	27.4483	24.6544	22.9389	NA	27.7718	18.9099	NA	24.0859	NA	NA	30.8158	31.8328	30.9175	33.46	31.3243
14	23.0958	22.2723	NA	25.0564	NA	NA	NA	NA	24.7035	35.9965	27.4483	28.3894	27.5659	29.6834	29.0266	31.7126	47.3287	NA	24.6937	36.4278	30.8205	27.2228	22.7331	NA	24.6544	27.1934	29.6638	NA	25.4681	NA	NA	25.8112	27.262	23.135	26.7621	26.7719	37.8884	NA	28.1933	20.5176	NA	21.9684	NA	NA	30.3073	27.9681	37.9349	49.4273	26.5443
15	NA	21.5665	NA	26.8993	NA	NA	NA	NA	28.3894	43.4859	31.1146	31.2616	31.0068	32.8889	27.9776	33.2124	NA	NA	27.7424	29.3109	33.7908	27.5561	21.0372	NA	26.1543	27.9482	28.7913	NA	26.9189	NA	NA	30.2225	26.1053	21.3999	30.0559	24.9387	69.5226	NA	26.468	20.8999	NA	25.4093	NA	NA	46.9864	34.2736	36.206	55.9362	35.3924
16	NA	22.8213	NA	24.6642	NA	NA	NA	NA	28.8991	NA	31.3695	27.7718	34.3104	NA	31.3695	36.2612	NA	NA	25.5367	30.5558	33.9378	28.4188	21.6155	NA	26.1347	27.2718	29.4579	NA	26.3504	NA	NA	32.1929	32.1929	26.6052	26.4386	28.8011	NA	NA	27.958	24.6937	NA	24.8309	NA	NA	NA	32.443	NA	NA	46.783
17	NA	23.7624	NA	24.9387	NA	NA	NA	NA	33.9967	NA	38.1825	31.3205	41.9763	NA	29.6638	37.8884	NA	NA	25.772	30.6539	30.0265	28.1443	20.4	NA	25.821	29.0462	34.3986	NA	26.7425	NA	NA	34.2221	31.3891	25.5171	29.9578	27.6934	NA	NA	27.86	NA	NA	27.8796	NA	NA	NA	35.5958	NA	NA	50.6477
18	NA	22.8997	NA	27.7228	NA	NA	NA	NA	33.4477	NA	43.4957	30.8107	46.2896	NA	32.6635	39.006	NA	NA	30.5166	33.9477	36.6141	27.5561	15.6161	NA	25.6053	28.1933	37.0944	NA	26.4092	NA	NA	31.1244	37.3885	32.8889	29.2226	29.1344	NA	NA	25.4289	NA	NA	NA	NA	NA	NA	39.1553	NA	NA	45.2575
19	NA	21.7626	NA	29.6834	NA	NA	NA	NA	NA	NA	43.4271	33.5653	49.4363	NA	34.1437	42.3194	NA	NA	28.9579	38.7217	34.3398	30.9087	24.4682	NA	27.3993	32.1635	38.3198	NA	27.3699	NA	NA	36.7317	NA	38.5648	24.9779	29.9775	NA	NA	29.9971	NA	NA	NA	NA	NA	NA	42.7149	NA	NA	56.9532
20	NA	22.6645	NA	28.1933	NA	NA	NA	NA	NA	NA	53.0928	32.1831	57.9453	NA	39.8392	46.6719	NA	NA	30.0069	35.8984	43.4075	29.3991	22.7429	NA	24.8407	28.3796	35.6338	NA	28.7815	NA	NA	36.5945	NA	NA	27.213	NA	NA	NA	32.0655	NA	NA	NA	NA	NA	NA	64.4792	NA	NA	NA
21	NA	22.8997	NA	29.0168	NA	NA	NA	NA	NA	NA	61.6998	32.7909	60.8862	NA	39.8196	NA	NA	NA	31.5851	37.4375	42.1821	30.1441	23.8016	NA	25.3603	28.7423	43.4173	NA	27.6542	NA	NA	48.858	NA	NA	31.8008	NA	NA	NA	31.7028	NA	NA	NA	NA	NA	NA	NA	NA	NA	NA
22	NA	NA	NA	41.8782	NA	NA	NA	NA	NA	NA	NA	31.791	NA	NA	NA	NA	NA	NA	30.3696	39.006	49.8284	31.1832	22.2331	NA	25.1348	32.2713	NA	NA	25.7916	NA	NA	NA	NA	NA	35.0064	NA	NA	NA	31.7028	NA	NA	NA	NA	NA	NA	NA	NA	NA	NA
23	NA	NA	NA	50.8185	NA	NA	NA	NA	NA	NA	NA	45.2505	NA	NA	NA	NA	NA	NA	31.693	43.584	NA	25.1348	23.233	NA	29.0952	30.6048	NA	NA	28.0463	NA	NA	NA	NA	NA	NA	NA	NA	NA	29.8402	NA	NA	NA	NA	NA	NA	NA	NA	NA	NA
24	NA	NA	NA	NA	NA	NA	NA	NA	NA	NA	NA	49.9755	NA	NA	NA	NA	NA	NA	30.7127	42.888	NA	33.8594	22.7821	NA	29.1344	31.4675	NA	NA	29.0756	NA	NA	NA	NA	NA	NA	NA	NA	NA	39.006	NA	NA	NA	NA	NA	NA	NA	NA	NA	NA
25	NA	NA	NA	NA	NA	NA	NA	NA	NA	NA	NA	NA	NA	NA	NA	NA	NA	NA	35.6142	42.0645	NA	33.6144	24.0173	NA	32.7909	34.6829	NA	NA	32.6243	NA	NA	NA	NA	NA	NA	NA	NA	NA	NA	NA	NA	NA	NA	NA	NA	NA	NA	NA	NA
26	NA	NA	NA	NA	NA	NA	NA	NA	NA	NA	NA	NA	NA	NA	NA	NA	NA	NA	NA	43.7898	NA	33.7908	25.821	NA	31.7616	35.1632	NA	NA	30.4186	NA	NA	NA	NA	NA	NA	NA	NA	NA	NA	NA	NA	NA	NA	NA	NA	NA	NA	NA	NA
27	NA	NA	NA	NA	NA	NA	NA	NA	NA	NA	NA	NA	NA	NA	NA	NA	NA	NA	NA	46.0347	NA	29.9578	25.0466	NA	31.1244	39.153	NA	NA	33.4085	NA	NA	NA	NA	NA	NA	NA	NA	NA	NA	NA	NA	NA	NA	NA	NA	NA	NA	NA	NA
28	NA	NA	NA	NA	NA	NA	NA	NA	NA	NA	NA	NA	NA	NA	NA	NA	NA	NA	NA	46.0249	NA	32.9772	24.3898	NA	33.2811	39.202	NA	NA	32.8791	NA	NA	NA	NA	NA	NA	NA	NA	NA	NA	NA	NA	NA	NA	NA	NA	NA	NA	NA	NA
29	NA	NA	NA	NA	NA	NA	NA	NA	NA	NA	NA	NA	NA	NA	NA	NA	NA	NA	NA	NA	NA	32.8595	29.8696	NA	31.7518	43.3095	NA	NA	36.6239	NA	NA	NA	NA	NA	NA	NA	NA	NA	NA	NA	NA	NA	NA	NA	NA	NA	NA	NA	NA
30	NA	NA	NA	NA	NA	NA	NA	NA	NA	NA	NA	NA	NA	NA	NA	NA	NA	NA	NA	NA	NA	32.0753	28.9874	NA	33.2516	46.6425	NA	NA	38.359	NA	NA	NA	NA	NA	NA	NA	NA	NA	NA	NA	NA	NA	NA	NA	NA	NA	NA	NA	NA
31	NA	NA	NA	NA	NA	NA	NA	NA	NA	NA	NA	NA	NA	NA	NA	NA	NA	NA	NA	NA	NA	35.1338	NA	NA	42.8487	NA	NA	NA	36.9081	NA	NA	NA	NA	NA	NA	NA	NA	NA	NA	NA	NA	NA	NA	NA	NA	NA	NA	NA	NA
32	NA	NA	NA	NA	NA	NA	NA	NA	NA	NA	NA	NA	NA	NA	NA	NA	NA	NA	NA	NA	NA	35.3201	NA	NA	62.7389	NA	NA	NA	37.0552	NA	NA	NA	NA	NA	NA	NA	NA	NA	NA	NA	NA	NA	NA	NA	NA	NA	NA	NA	NA
33	NA	NA	NA	NA	NA	NA	NA	NA	NA	NA	NA	NA	NA	NA	NA	NA	NA	NA	NA	NA	NA	NA	NA	NA	NA	NA	NA	NA	41.6528	NA	NA	NA	NA	NA	NA	NA	NA	NA	NA	NA	NA	NA	NA	NA	NA	NA	NA	NA	NA
[truncated: 70 more columns]

## Sheet: Table b
	Experiment_1	Experiment_1	Experiment_1	Experiment_1	Experiment_1	Experiment_1	Experiment_1	Experiment_1	Experiment_1	Experiment_1	Experiment_2	Experiment_2	Experiment_2	Experiment_2	Experiment_2	Experiment_2	Experiment_2	Experiment_2	Experiment_2	Experiment_2	Experiment_2	Experiment_2	Experiment_2	Experiment_2	Experiment_2	Experiment_2	Experiment_2	Experiment_2	Experiment_2	Experiment_3	Experiment_3	Experiment_3	Experiment_3	Experiment_3	Experiment_3	Experiment_3	Experiment_3	Experiment_3	Experiment_3	Experiment_3	Experiment_3	Experiment_3	Experiment_4	Experiment_4	Experiment_4	Experiment_4	Experiment_4	Experiment_4	Experiment_4
	cell_1.1	cell_1.2	cell_1.3	cell_1.4	cell_1.5	cell_1.6	cell_1.7	cell_1.8	cell_1.9	cell_1.10	cell_1.11	cell_1.12	cell_1.13	cell_1.14	cell_1.15	cell_1.16	cell_1.17	cell_1.18	cell_1.19	cell_1.20	cell_1.21	cell_1.22	cell_1.23	cell_1.24	cell_1.25	cell_1.26	cell_1.27	cell_1.28	cell_1.29	cell_1.30	cell_1.31	cell_1.32	cell_1.33	cell_1.34	cell_1.35	cell_1.36	cell_1.37	cell_1.38	cell_1.39	cell_1.40	cell_1.41	cell_1.42	cell_1.43	cell_1.44	cell_1.45	cell_1.46	cell_1.47	cell_1.48	cell_1.49
1	0	0	0	0	0	0	0	0	0	0	0	0	0	0	0	0	0	0	0	0	0	0	0	0	0	0	0	0	0	0	0	0	0	0	0	0	0	0	0	0	0	0	0	0	0	0	0	0	0
2	2	1	1.33333	1.33333	1.66667	1.33333	1.33333	1.33333	2	1.33333	1	1	1	1	1.33333	2	1	1.66667	1	2.33333	1	1	1.66667	1	0.666667	1	1	1	1.33333	1	1	1	1	1	1.33333	1.33333	1	1.66667	0.666667	1.33333	1	1	1.33333	1.66667	2	1.66667	2.33333	1.66667	2.33333
3	3.33333	2.33333	3	2.66667	2.66667	2.66667	2.66667	3	3.33333	2.33333	2	2	2	2.33333	2.66667	3.33333	2	3	2.33333	4	2.33333	2.33333	2.33333	2.33333	2	2	2	2.33333	2.33333	2.33333	2	2	2.33333	2.33333	2.33333	2.33333	2.33333	3.66667	2	2.66667	2	2.33333	2.66667	3	3.33333	3.33333	4	3	4
4	4.33333	3.33333	4.66667	3.66667	4.33333	3.66667	4	4.33333	5	3.66667	3.33333	3	3.33333	4	4	5.33333	3	4.66667	4	7.33333	3.33333	3.66667	3.66667	3.33333	3	3.33333	3	3.33333	3.33333	3.66667	3.66667	3	3.33333	3.33333	3.66667	3.66667	3.33333	5	2.66667	4	3.33333	3.33333	4	4.66667	4.66667	4.66667	5.66667	4.66667	5.33333
5	5.66667	5	6.33333	5	6.66667	5	5.33333	5.33333	6.66667	5	4.66667	4	4.66667	5	5	7.33333	4.33333	5.66667	5	9	4.66667	4.66667	4.66667	4.33333	4	4.33333	4	4.66667	4.33333	5	5	4	4.33333	4.33333	5	5	4.66667	6	4	5	4.33333	4.33333	5.66667	7	6.33333	6.33333	7	6	6.66667
6	7	6.33333	8.33333	6.33333	7.66667	6.33333	6.33333	6.66667	8.33333	6	5.66667	5	5.66667	6.33333	6	9	6	6.66667	6	11.3333	6.33333	5.66667	5.66667	5.33333	5	5	5	5.66667	5.33333	6.33333	6.33333	5	5.33333	5.33333	6	6	5.66667	8	5	6	6	5.66667	7.33333	10	7.66667	7.66667	8.66667	7.33333	8.33333
7	8	7.33333	10.6667	7.33333	9	9.66667	8	7.66667	10.6667	7	6.66667	6	6.66667	7.33333	7.33333	11.3333	7.33333	7.66667	7	13	8	7	6.33333	6.33333	6.33333	6.33333	6	7	6.66667	NA	8.66667	6	6.33333	7	7	7	7	10	6	7	7	6.66667	9	14	9	9	10.3333	9	9.66667
8	9.33333	8.66667	14	8.66667	10	NA	10	9	12.3333	8	8	7	8	8.66667	9	13.6667	8.66667	9.66667	8.33333	14.3333	9	8.66667	8	7.66667	8	7	7	8.33333	7.33333	NA	12.6667	7.33333	7.66667	8	8	8.33333	8	12.3333	7.33333	8	8.33333	8	11	18.3333	10.3333	10.3333	11.6667	10.3333	10.6667
9	10.3333	9.66667	20.6667	9.66667	11.6667	NA	12	10.6667	14	9.33333	9.33333	8.33333	9.33333	9.66667	10	15.3333	10	NA	9	17.6667	10.3333	10	9	9	9	8	8	9.66667	8.33333	NA	19	8.33333	8.66667	9.66667	9	9.33333	9.33333	NA	8.33333	9.33333	9.66667	9	13.6667	25.6667	11.6667	11.6667	13	11.6667	12
10	11.6667	11	NA	11	13.3333	NA	13.6667	12	16	10.6667	10.6667	10	10.6667	10.6667	11.3333	18.3333	11	NA	10	20.6667	12	10.6667	10	10.3333	10	9	9	12	9.33333	NA	NA	9.66667	9.66667	10.6667	10.3333	10.6667	10.6667	NA	9.33333	11.3333	11.3333	10.3333	18	31.3333	13	13	14.6667	13	13.6667
11	13	12	NA	12	14.6667	NA	NA	13	17.6667	12	12	11	12	11.6667	13	22.6667	13	NA	11.3333	22.3333	13.3333	11.6667	11	12.3333	11	10	10.3333	NA	10.3333	NA	NA	12.6667	10.6667	12	11.3333	12	12	NA	10.6667	12.6667	13.3333	11.3333	NA	NA	14.3333	14.3333	16	14.6667	14.6667
12	14	13.3333	NA	13.3333	NA	NA	NA	14.3333	20	13.6667	13.6667	12	14	13	14.6667	27	15	NA	12.3333	25.3333	14.6667	13	12	NA	12	11	11.6667	NA	11.3333	NA	NA	14	12	13	12.3333	13	13.3333	NA	11.6667	14	17.3333	12.3333	NA	NA	15.6667	16	17.6667	16.3333	16.3333
13	16	14.6667	NA	14.3333	NA	NA	NA	NA	21.3333	15.3333	16	13	16	14.6667	16.3333	31.3333	19.6667	NA	13.3333	27.3333	16.3333	14	13	NA	12.6667	12	13	NA	12.6667	NA	NA	15.6667	13.6667	14.3333	13.6667	14.3333	15.3333	NA	13	15.3333	NA	13.6667	NA	NA	17.3333	17.3333	19.3333	18.6667	17.6667
14	18	16	NA	15.6667	NA	NA	NA	NA	24	18.6667	21	14	20.3333	16	18.6667	33.6667	22.3333	NA	14.3333	29.3333	18.6667	15	14.3333	NA	13.6667	13	14.3333	NA	14.3333	NA	NA	17	15	15.6667	14.6667	15.6667	19.6667	NA	14.3333	17	NA	15.3333	NA	NA	19.3333	19	21.6667	23.6667	19.6667
15	NA	17	NA	18	NA	NA	NA	NA	27.3333	20	24	15	24.6667	17.3333	21.6667	39.6667	NA	NA	15.6667	31.3333	20.3333	16	15	NA	15	14.3333	15.6667	NA	15.6667	NA	NA	18.6667	16.3333	17	15.6667	16.6667	27.3333	NA	15.6667	19	NA	17	NA	NA	24	21.3333	24.3333	26.6667	22
16	NA	18.3333	NA	19.3333	NA	NA	NA	NA	30.3333	NA	27	16.3333	27	NA	24	43	NA	NA	17	33.6667	22.6667	17	16.3333	NA	16	15.3333	17.3333	NA	16.6667	NA	NA	20.3333	18.3333	18.6667	16.6667	18.3333	NA	NA	17	21.3333	NA	18.6667	NA	NA	NA	23	NA	NA	25.6667
17	NA	19.6667	NA	20.6667	NA	NA	NA	NA	35.6667	NA	32.3333	17.3333	33	NA	27	46.6667	NA	NA	18	36.3333	25.3333	18	17.3333	NA	17.3333	16.3333	19.3333	NA	17.6667	NA	NA	22.3333	20.3333	21	18	19.6667	NA	NA	18.3333	NA	NA	21.6667	NA	NA	NA	25.6667	NA	NA	28.6667
18	NA	21	NA	22	NA	NA	NA	NA	40.6667	NA	33.6667	18.6667	38	NA	30.6667	49.6667	NA	NA	19.3333	40.6667	28.3333	19	18.6667	NA	18.3333	17.3333	21.6667	NA	19	NA	NA	23	24	23	19.3333	21.6667	NA	NA	20.3333	NA	NA	NA	NA	NA	NA	28.3333	NA	NA	31.6667
19	NA	22.3333	NA	24	NA	NA	NA	NA	NA	NA	38.3333	20	41.6667	NA	33.3333	52	NA	NA	20.3333	42.6667	31	20	19.6667	NA	19.3333	18.6667	24.3333	NA	20	NA	NA	25.3333	NA	26.6667	21	23.6667	NA	NA	22.3333	NA	NA	NA	NA	NA	NA	32	NA	NA	36.3333
20	NA	23.6667	NA	26.3333	NA	NA	NA	NA	NA	NA	48	21.3333	47.3333	NA	37	60.3333	NA	NA	21.6667	45.3333	34.6667	21.3333	21	NA	20.3333	19.6667	26.6667	NA	21.3333	NA	NA	28	NA	NA	23	NA	NA	NA	25	NA	NA	NA	NA	NA	NA	41	NA	NA	NA
21	NA	25.3333	NA	28	NA	NA	NA	NA	NA	NA	52.6667	23	53	NA	42.3333	NA	NA	NA	23	48.3333	38.3333	22.3333	22	NA	21.3333	21	30.3333	NA	22.3333	NA	NA	33.3333	NA	NA	25.3333	NA	NA	NA	27.6667	NA	NA	NA	NA	NA	NA	NA	NA	NA	NA
22	NA	NA	NA	32	NA	NA	NA	NA	NA	NA	NA	24.6667	NA	NA	NA	NA	NA	NA	24.3333	50.6667	42	23.6667	24	NA	22.6667	22	NA	NA	23.3333	NA	NA	NA	NA	NA	30.6667	NA	NA	NA	30.3333	NA	NA	NA	NA	NA	NA	NA	NA	NA	NA
23	NA	NA	NA	37.3333	NA	NA	NA	NA	NA	NA	NA	29.3333	NA	NA	NA	NA	NA	NA	26	53.6667	NA	24.6667	25.3333	NA	24	23.6667	NA	NA	24.6667	NA	NA	NA	NA	NA	NA	NA	NA	NA	33.3333	NA	NA	NA	NA	NA	NA	NA	NA	NA	NA
24	NA	NA	NA	NA	NA	NA	NA	NA	NA	NA	NA	33	NA	NA	NA	NA	NA	NA	28	57.3333	NA	28.3333	26.6667	NA	25	24.6667	NA	NA	26.3333	NA	NA	NA	NA	NA	NA	NA	NA	NA	39.6667	NA	NA	NA	NA	NA	NA	NA	NA	NA	NA
25	NA	NA	NA	NA	NA	NA	NA	NA	NA	NA	NA	NA	NA	NA	NA	NA	NA	NA	30.3333	62	NA	29.3333	28.3333	NA	26.3333	25	NA	NA	27.3333	NA	NA	NA	NA	NA	NA	NA	NA	NA	NA	NA	NA	NA	NA	NA	NA	NA	NA	NA	NA
26	NA	NA	NA	NA	NA	NA	NA	NA	NA	NA	NA	NA	NA	NA	NA	NA	NA	NA	NA	71.3333	NA	30.6667	30	NA	27.3333	27	NA	NA	28.6667	NA	NA	NA	NA	NA	NA	NA	NA	NA	NA	NA	NA	NA	NA	NA	NA	NA	NA	NA	NA
27	NA	NA	NA	NA	NA	NA	NA	NA	NA	NA	NA	NA	NA	NA	NA	NA	NA	NA	NA	85.3333	NA	32	32	NA	28.6667	31.3333	NA	NA	30	NA	NA	NA	NA	NA	NA	NA	NA	NA	NA	NA	NA	NA	NA	NA	NA	NA	NA	NA	NA
28	NA	NA	NA	NA	NA	NA	NA	NA	NA	NA	NA	NA	NA	NA	NA	NA	NA	NA	NA	88.6667	NA	33	34	NA	30	33.6667	NA	NA	31.3333	NA	NA	NA	NA	NA	NA	NA	NA	NA	NA	NA	NA	NA	NA	NA	NA	NA	NA	NA	NA
29	NA	NA	NA	NA	NA	NA	NA	NA	NA	NA	NA	NA	NA	NA	NA	NA	NA	NA	NA	NA	NA	34.3333	36	NA	31.6667	36	NA	NA	33	NA	NA	NA	NA	NA	NA	NA	NA	NA	NA	NA	NA	NA	NA	NA	NA	NA	NA	NA	NA
30	NA	NA	NA	NA	NA	NA	NA	NA	NA	NA	NA	NA	NA	NA	NA	NA	NA	NA	NA	NA	NA	36	38.3333	NA	33.6667	38.6667	NA	NA	34.3333	NA	NA	NA	NA	NA	NA	NA	NA	NA	NA	NA	NA	NA	NA	NA	NA	NA	NA	NA	NA
31	NA	NA	NA	NA	NA	NA	NA	NA	NA	NA	NA	NA	NA	NA	NA	NA	NA	NA	NA	NA	NA	37.3333	NA	NA	37.3333	NA	NA	NA	36.6667	NA	NA	NA	NA	NA	NA	NA	NA	NA	NA	NA	NA	NA	NA	NA	NA	NA	NA	NA	NA
32	NA	NA	NA	NA	NA	NA	NA	NA	NA	NA	NA	NA	NA	NA	NA	NA	NA	NA	NA	NA	NA	39.3333	NA	NA	43.6667	NA	NA	NA	39	NA	NA	NA	NA	NA	NA	NA	NA	NA	NA	NA	NA	NA	NA	NA	NA	NA	NA	NA	NA
33	NA	NA	NA	NA	NA	NA	NA	NA	NA	NA	NA	NA	NA	NA	NA	NA	NA	NA	NA	NA	NA	NA	NA	NA	NA	NA	NA	NA	42	NA	NA	NA	NA	NA	NA	NA	NA	NA	NA	NA	NA	NA	NA	NA	NA	NA	NA	NA	NA
[truncated: 70 more columns]

## Sheet: Table c
	Experiment_7	Experiment_7	Experiment_7	Experiment_7	Experiment_7	Experiment_7	Experiment_7	Experiment_7	Experiment_7	Experiment_7	Experiment_7	Experiment_7	Experiment_7	Experiment_7	Experiment_7	Experiment_7	Experiment_7	Experiment_7	Experiment_7	Experiment_7	Experiment_7	Experiment_7	Experiment_7	Experiment_7	Experiment_7	Experiment_7	Experiment_7	Experiment_7	Experiment_7	Experiment_7	Experiment_7	Experiment_7	Experiment_7	Experiment_7	Experiment_7	Experiment_7	Experiment_7	Experiment_7	Experiment_7	Experiment_7	Experiment_7	Experiment_7	Experiment_7	Experiment_7	Experiment_7	Experiment_7	Experiment_7	Experiment_8	Experiment_8
	cell_2.1	cell_2.2	cell_2.3	cell_2.4	cell_2.5	cell_2.6	cell_2.7	cell_2.8	cell_2.9	cell_2.10	cell_2.11	cell_2.12	cell_2.13	cell_2.14	cell_2.15	cell_2.16	cell_2.17	cell_2.18	cell_2.19	cell_2.20	cell_2.21	cell_2.22	cell_2.23	cell_2.24	cell_2.25	cell_2.26	cell_2.27	cell_2.28	cell_2.29	cell_2.30	cell_2.31	cell_2.32	cell_2.33	cell_2.34	cell_2.35	cell_2.36	cell_2.37	cell_2.38	cell_2.39	cell_2.40	cell_2.41	cell_2.42	cell_2.43	cell_2.44	cell_2.45	cell_2.46	cell_2.47	cell_2.48	cell_2.49
1	17.472	20.593	16.102	18.808	20.179	19.591	15.249	15.86	14.639	17.392	16.862	22.482	19.822	20.801	17.115	19.879	20.064	20.34	21.273	16.562	25.258	19.119	20.64	16.654	18.601	16.47	11.506	19.81	22.321	15.146	17.599	22.194	18.14	15.664	18.728	24.498	15.986	16.148	13.188	18.946	18.106	15.664	18.728	21.354	16.597	25.154	24.014	15.675	11.736
2	21.089	21.296	17.633	17.357	20.778	18.9	20.95	24.152	14.478	18.831	17.587	19.246	18.969	21.135	19.499	21.043	22.805	20.455	20.236	18.394	21.388	22.24	19.856	17.852	19.856	22.885	16.182	21.665	21.549	17.587	20.755	20.259	19.476	16.459	21.953	26.007	22.621	16.862	16.758	16.643	16.551	15.86	20.95	18.693	23.15	27.942	25.65	23.542	20.455
3	20.305	21.86	18.013	22.505	19.188	21.25	20.801	16.712	18.555	20.927	19.453	22.955	20.386	19.073	21.02	19.81	20.755	19.937	17.173	19.603	21.849	24.705	24.291	21.572	21.077	22.92	20.582	21.572	20.974	18.451	20.789	19.81	20.133	17.541	23.312	23.957	16.125	18.013	20.778	20.248	17.23	18.371	22.217	19.925	21.215	29.301	24.095	21.642	14.973
4	22.033	17.829	21.215	24.337	18.682	16.401	15.917	21.192	20.559	18.497	17.587	20.524	19.684	20.478	19.707	18.497	23.116	25.938	17.011	19.718	21.319	24.544	22.183	20.893	22.171	16.597	16.021	21.25	22.978	17.783	20.893	20.271	21.584	19.269	22.747	23.623	15.353	17.196	23.104	20.133	18.486	19.661	21.549	20.018	28.057	31.155	27.02	22.609	15.768
5	24.947	25.765	21.768	24.59	21.25	17.253	23.553	18.705	18.624	19.257	17.311	20.812	21.768	18.705	20.121	20.985	24.337	22.022	23.093	22.079	20.19	27.4	24.221	24.44	24.118	58.601	15.998	17.806	19.062	17.069	19.879	20.49	18.336	19.73	18.797	24.21	22.298	17.956	18.785	21.953	18.382	17.369	18.417	22.229	26.018	73.505	29.289	22.989	16.228
6	27.7	26.663	22.459	23.3	20.409	28.091	23.715	16.493	17.841	17.035	17.99	25.776	25.431	19.741	24.118	21.791	24.268	22.24	18.002	22.125	21.653	25.477	28.667	24.256	23.749	NA	16.839	19.234	26.732	18.566	24.74	21.803	19.039	22.885	19.142	25.534	20.11	17.161	24.302	21.031	25.788	17.979	21.642	23.277	NA	NA	31.236	29.047	20.329
7	26.894	28.437	24.913	22.528	17.99	22.425	25.247	19.016	21.238	21.204	19.925	27.17	26.421	18.428	26.133	19.257	24.717	25.327	15.468	18.969	20.835	36.326	34.034	24.521	24.279	NA	18.29	20.789	28.022	16.378	24.889	23.001	21.238	20.329	20.478	24.728	25.212	17.173	24.118	18.232	21.699	19.672	16.908	20.018	NA	NA	33.816	32.94	22.287
8	26.744	30.268	25.938	23.957	26.156	27.17	23.761	21.538	23.692	21.331	21.561	27.285	NA	20.49	26.168	24.913	23.588	23.45	18.175	18.705	21.987	NA	26.156	25.408	27.377	NA	17.369	20.57	29.301	18.854	20.72	24.245	24.417	20.801	21.549	24.694	22.69	17.369	20.259	21.918	22.978	20.075	20.72	21.803	NA	NA	33.159	34.069	18.451
9	28.218	29.22	37.824	25.638	26.375	23.911	22.908	25.247	NA	22.966	22.759	27.112	NA	19.557	28.794	21.757	23.496	26.133	17.622	15.848	21.999	NA	NA	25.73	26.963	NA	28.299	21.653	37.167	20.421	25.696	26.479	24.325	21.284	22.862	24.314	21.572	18.728	21.711	23.957	25.293	21.653	21.526	29.923	NA	NA	31.789	NA	25.799
10	28.057	31.869	NA	29.37	37.559	42.822	26.456	24.544	NA	21.077	22.183	27.734	NA	23.853	35.221	28.356	26.456	29.059	20.927	21.008	19.557	NA	NA	25.454	27.976	NA	22.413	33.413	NA	25.857	27.055	26.272	22.217	23.335	18.682	29.186	24.129	17.541	24.866	23.738	26.133	23.358	22.24	25.984	NA	NA	30.694	NA	27.343
11	28.621	30.533	NA	46.197	NA	NA	20.075	24.809	NA	19.211	25.454	35.785	NA	21.388	NA	35.612	24.648	27.043	26.467	23.496	20.536	NA	NA	22.966	27.055	NA	27.642	39.459	NA	29.704	26.306	28.045	23.139	24.82	21.181	26.272	25.776	17.184	29.923	22.517	27.308	24.924	22.563	32.284	NA	NA	34.288	NA	21.227
12	29.784	31.167	NA	NA	NA	NA	24.406	32.042	NA	21.814	23.07	38.618	NA	23.761	NA	NA	29.047	46.957	26.341	24.751	24.521	NA	NA	25.327	27.965	NA	30.418	NA	NA	32.629	24.913	22.379	21.238	27.147	20.225	24.602	30.211	20.812	24.337	27.228	27.135	24.567	23.369	27.953	NA	NA	36.476	NA	24.141
13	36.28	30.948	NA	NA	NA	NA	23.968	NA	NA	21.066	24.36	47.234	NA	25.822	NA	NA	27.619	NA	41.947	28.322	21.745	NA	NA	45.84	27.803	NA	55.284	NA	NA	27.02	31.478	25.638	25.27	32.549	25.995	26.099	31.293	21.642	23.507	24.59	28.425	34.679	23.507	32.549	NA	NA	38.284	NA	22.413
14	38.653	35.163	NA	NA	NA	NA	29.347	NA	NA	23.219	32.572	NA	NA	26.778	NA	NA	31.328	NA	NA	27.826	26.364	NA	NA	NA	31.973	NA	NA	NA	NA	NA	35.152	27.02	24.072	18.9	47.625	26.732	64.118	23.611	31.501	25.638	29.151	NA	25.177	NA	NA	NA	NA	NA	24.659
15	35.244	NA	NA	NA	NA	NA	25.166	NA	NA	23.623	36.211	NA	NA	NA	NA	NA	NA	NA	NA	26.318	27.17	NA	NA	NA	31.19	NA	NA	NA	NA	NA	34.875	28.805	24.406	20.305	NA	25.085	NA	23.001	25.892	25.638	33.436	NA	29.347	NA	NA	NA	NA	NA	24.636
16	35.278	NA	NA	NA	NA	NA	27.02	NA	NA	27.066	30.717	NA	NA	NA	NA	NA	NA	NA	NA	29.047	NA	NA	NA	NA	33.539	NA	NA	NA	NA	NA	37.11	33.194	26.467	19.787	NA	26.663	NA	26.295	24.475	27.919	32.376	NA	NA	NA	NA	NA	NA	NA	26.928
17	34.622	NA	NA	NA	NA	NA	32.341	NA	NA	27.746	39.528	NA	NA	NA	NA	NA	NA	NA	NA	30.763	NA	NA	NA	NA	34.069	NA	NA	NA	NA	NA	NA	30.729	29.704	25.258	NA	29.543	NA	29.462	30.683	35.751	33.735	NA	NA	NA	NA	NA	NA	NA	27.619
18	45.598	NA	NA	NA	NA	NA	53.971	NA	NA	28.345	NA	NA	NA	NA	NA	NA	NA	NA	NA	39.125	NA	NA	NA	NA	41.244	NA	NA	NA	NA	NA	NA	27.469	28.218	24.014	NA	26.214	NA	NA	43.179	NA	34.392	NA	NA	NA	NA	NA	NA	NA	30.107
19	50.101	NA	NA	NA	NA	NA	NA	NA	NA	33.539	NA	NA	NA	NA	NA	NA	NA	NA	NA	NA	NA	NA	NA	NA	NA	NA	NA	NA	NA	NA	NA	35.486	32.526	25.224	NA	34.507	NA	NA	NA	NA	36.062	NA	NA	NA	NA	NA	NA	NA	38.538
20	NA	NA	NA	NA	NA	NA	NA	NA	NA	NA	NA	NA	NA	NA	NA	NA	NA	NA	NA	NA	NA	NA	NA	NA	NA	NA	NA	NA	NA	NA	NA	44.573	31.512	23.496	NA	NA	NA	NA	NA	NA	42.868	NA	NA	NA	NA	NA	NA	NA	NA
21	NA	NA	NA	NA	NA	NA	NA	NA	NA	NA	NA	NA	NA	NA	NA	NA	NA	NA	NA	NA	NA	NA	NA	NA	NA	NA	NA	NA	NA	NA	NA	NA	39.77	28.356	NA	NA	NA	NA	NA	NA	NA	NA	NA	NA	NA	NA	NA	NA	NA
22	NA	NA	NA	NA	NA	NA	NA	NA	NA	NA	NA	NA	NA	NA	NA	NA	NA	NA	NA	NA	NA	NA	NA	NA	NA	NA	NA	NA	NA	NA	NA	NA	NA	38.515	NA	NA	NA	NA	NA	NA	NA	NA	NA	NA	NA	NA	NA	NA	NA
23	NA	NA	NA	NA	NA	NA	NA	NA	NA	NA	NA	NA	NA	NA	NA	NA	NA	NA	NA	NA	NA	NA	NA	NA	NA	NA	NA	NA	NA	NA	NA	NA	NA	NA	NA	NA	NA	NA	NA	NA	NA	NA	NA	NA	NA	NA	NA	NA	NA
24	NA	NA	NA	NA	NA	NA	NA	NA	NA	NA	NA	NA	NA	NA	NA	NA	NA	NA	NA	NA	NA	NA	NA	NA	NA	NA	NA	NA	NA	NA	NA	NA	NA	NA	NA	NA	NA	NA	NA	NA	NA	NA	NA	NA	NA	NA	NA	NA	NA
25	NA	NA	NA	NA	NA	NA	NA	NA	NA	NA	NA	NA	NA	NA	NA	NA	NA	NA	NA	NA	NA	NA	NA	NA	NA	NA	NA	NA	NA	NA	NA	NA	NA	NA	NA	NA	NA	NA	NA	NA	NA	NA	NA	NA	NA	NA	NA	NA	NA
26	NA	NA	NA	NA	NA	NA	NA	NA	NA	NA	NA	NA	NA	NA	NA	NA	NA	NA	NA	NA	NA	NA	NA	NA	NA	NA	NA	NA	NA	NA	NA	NA	NA	NA	NA	NA	NA	NA	NA	NA	NA	NA	NA	NA	NA	NA	NA	NA	NA
27	NA	NA	NA	NA	NA	NA	NA	NA	NA	NA	NA	NA	NA	NA	NA	NA	NA	NA	NA	NA	NA	NA	NA	NA	NA	NA	NA	NA	NA	NA	NA	NA	NA	NA	NA	NA	NA	NA	NA	NA	NA	NA	NA	NA	NA	NA	NA	NA	NA
28	NA	NA	NA	NA	NA	NA	NA	NA	NA	NA	NA	NA	NA	NA	NA	NA	NA	NA	NA	NA	NA	NA	NA	NA	NA	NA	NA	NA	NA	NA	NA	NA	NA	NA	NA	NA	NA	NA	NA	NA	NA	NA	NA	NA	NA	NA	NA	NA	NA
29	NA	NA	NA	NA	NA	NA	NA	NA	NA	NA	NA	NA	NA	NA	NA	NA	NA	NA	NA	NA	NA	NA	NA	NA	NA	NA	NA	NA	NA	NA	NA	NA	NA	NA	NA	NA	NA	NA	NA	NA	NA	NA	NA	NA	NA	NA	NA	NA	NA
30	NA	NA	NA	NA	NA	NA	NA	NA	NA	NA	NA	NA	NA	NA	NA	NA	NA	NA	NA	NA	NA	NA	NA	NA	NA	NA	NA	NA	NA	NA	NA	NA	NA	NA	NA	NA	NA	NA	NA	NA	NA	NA	NA	NA	NA	NA	NA	NA	NA
31	NA	NA	NA	NA	NA	NA	NA	NA	NA	NA	NA	NA	NA	NA	NA	NA	NA	NA	NA	NA	NA	NA	NA	NA	NA	NA	NA	NA	NA	NA	NA	NA	NA	NA	NA	NA	NA	NA	NA	NA	NA	NA	NA	NA	NA	NA	NA	NA	NA
32	NA	NA	NA	NA	NA	NA	NA	NA	NA	NA	NA	NA	NA	NA	NA	NA	NA	NA	NA	NA	NA	NA	NA	NA	NA	NA	NA	NA	NA	NA	NA	NA	NA	NA	NA	NA	NA	NA	NA	NA	NA	NA	NA	NA	NA	NA	NA	NA	NA
33	NA	NA	NA	NA	NA	NA	NA	NA	NA	NA	NA	NA	NA	NA	NA	NA	NA	NA	NA	NA	NA	NA	NA	NA	NA	NA	NA	NA	NA	NA	NA	NA	NA	NA	NA	NA	NA	NA	NA	NA	NA	NA	NA	NA	NA	NA	NA	NA	NA
[truncated: 57 more columns]

## Sheet: Table d
	Experiment_7	Experiment_7	Experiment_7	Experiment_7	Experiment_7	Experiment_7	Experiment_7	Experiment_7	Experiment_7	Experiment_7	Experiment_7	Experiment_7	Experiment_7	Experiment_7	Experiment_7	Experiment_7	Experiment_7	Experiment_7	Experiment_7	Experiment_7	Experiment_7	Experiment_7	Experiment_7	Experiment_7	Experiment_7	Experiment_7	Experiment_7	Experiment_7	Experiment_7	Experiment_7	Experiment_7	Experiment_7	Experiment_7	Experiment_7	Experiment_7	Experiment_7	Experiment_7	Experiment_7	Experiment_7	Experiment_7	Experiment_7	Experiment_7	Experiment_7	Experiment_7	Experiment_7	Experiment_7	Experiment_7	Experiment_8	Experiment_8
	cell_2.1	cell_2.2	cell_2.3	cell_2.4	cell_2.5	cell_2.6	cell_2.7	cell_2.8	cell_2.9	cell_2.10	cell_2.11	cell_2.12	cell_2.13	cell_2.14	cell_2.15	cell_2.16	cell_2.17	cell_2.18	cell_2.19	cell_2.20	cell_2.21	cell_2.22	cell_2.23	cell_2.24	cell_2.25	cell_2.26	cell_2.27	cell_2.28	cell_2.29	cell_2.30	cell_2.31	cell_2.32	cell_2.33	cell_2.34	cell_2.35	cell_2.36	cell_2.37	cell_2.38	cell_2.39	cell_2.40	cell_2.41	cell_2.42	cell_2.43	cell_2.44	cell_2.45	cell_2.46	cell_2.47	cell_2.48	cell_2.49
1	0	0	0	0	0	0	0	0	0	0	0	0	0	0	0	0	0	0	0	0	0	0	0	0	0	0	0	0	0	0	0	0	0	0	0	0	0	0	0	0	0	0	0	0	0	0	0	0	0
2	3.33333	2	2	0.666667	1.33333	1.66667	2	1.66667	1.66667	3.33333	1.33333	2	3	2	1.66667	1.66667	1.66667	1.66667	2	1.33333	2.33333	1.66667	1.66667	1.66667	2.33333	1.66667	0.666667	2	2.33333	2.33333	1.66667	1	1.33333	2	1.66667	1.66667	2.33333	1.66667	1.66667	2	2	2	1.66667	2.33333	1.66667	2	2	3	1.66667
3	4.66667	3.33333	4	2	3.66667	4	3.66667	3	3.66667	4.66667	3	3.66667	5.33333	4	4	3.66667	3.66667	3.33333	3.66667	3.33333	4.33333	4	3.33333	3	4	4.33333	2.33333	4	4	4	3.66667	3	3	4	3.66667	3.33333	4	3.33333	3.33333	3.66667	3.66667	3.66667	3.33333	4.66667	3	4	3.33333	5.33333	3.66667
4	6.66667	5.33333	7	4	5.33333	5.66667	5.66667	4.66667	5.33333	6.33333	5	5.66667	7	6	6.66667	5.33333	5	5.33333	6	4.66667	6	6.33333	5	5	6.33333	7.66667	4.33333	6.66667	4.66667	6	5.66667	5	4.66667	6	5.33333	4.66667	7	4.66667	4.66667	6	6	6	5.33333	6.33333	4.33333	7	5.66667	8	5.33333
5	8.66667	7.66667	9.33333	5.66667	8	8	7.33333	7.33333	7.66667	7.66667	7.33333	8	9.66667	8	9.33333	8	7	8.33333	8	6.66667	8	9.66667	7	7	8.33333	43	6.33333	8.33333	7.33333	8.33333	7.66667	7	6.33333	8	7.33333	6.33333	8.66667	6.66667	6	8.33333	7.33333	7.66667	7.66667	8.33333	6.33333	19.6667	7.66667	12.3333	7.33333
6	10.3333	9.66667	11.3333	7.66667	10	10	10	9	10	9	10	10.6667	12	9.66667	12	10	8.66667	10.6667	10	8.33333	10.3333	13.3333	9.33333	9	10	NA	8.66667	10.6667	10	10	9.66667	9.33333	8	10	9	8	11.3333	9	8	10.6667	9.66667	10	9.66667	11	NA	NA	10	18	9.33333
7	12.6667	12	15	9.66667	12	12.3333	12	11	13	11.3333	12.3333	14.3333	15.3333	11.3333	15	11.6667	10.3333	12.6667	12	10	12.3333	14.6667	12.3333	11	12	NA	10.6667	13.3333	16	12.3333	11.6667	11.3333	10	12	11	9.66667	13.6667	10.6667	10.3333	12.6667	11.3333	11.6667	12	13	NA	NA	12.3333	26.6667	11.6667
8	14.3333	14.3333	23.3333	12.3333	14.3333	14.6667	14	14	16	13	15	16	NA	13.6667	16	14	12.3333	14.6667	14.3333	11.6667	14.3333	NA	14	13	14.3333	NA	13.6667	16	20.3333	14.6667	13.3333	13.3333	11.6667	14	12.6667	11.6667	15.3333	12.6667	12.3333	14.6667	13.6667	13.6667	14.6667	15	NA	NA	14.3333	33	13.6667
9	16	16.3333	39.3333	15	24	17	15.3333	16	NA	15	18.3333	18.3333	NA	15.3333	18.6667	15.6667	14.3333	16.6667	16.6667	13.3333	16.6667	NA	NA	15.3333	16	NA	16.3333	19.6667	32.3333	17	16.3333	15.3333	13.6667	15.6667	14.3333	13.3333	17.3333	14.6667	14.6667	17.3333	15.6667	16	16.6667	17.3333	NA	NA	16.3333	NA	15.6667
10	18	18.3333	NA	18	35.3333	29.3333	16.3333	18.3333	NA	17.3333	20.3333	20.6667	NA	17.3333	23	18.3333	16.3333	20	19	15.6667	18.6667	NA	NA	17.6667	17.6667	NA	18.6667	24	NA	19.3333	18.3333	17.3333	15.3333	17.6667	17	14.6667	19.6667	16.3333	16.3333	19	17.6667	18	18.6667	19.6667	NA	NA	19.3333	NA	17.3333
11	20	20.6667	NA	24.3333	NA	NA	18.3333	22	NA	19.3333	23	27	NA	19	NA	22	18	24.3333	21.6667	17.3333	21.3333	NA	NA	20.3333	19.3333	NA	22	32.3333	NA	21.6667	20.3333	19.3333	17.6667	19.3333	19.3333	17	22	18.3333	18.3333	22	19	20.3333	20.6667	21.6667	NA	NA	22.6667	NA	19.6667
12	21.3333	22.6667	NA	NA	NA	NA	20.6667	24.3333	NA	22	25	29.6667	NA	21.3333	NA	NA	20.3333	40.6667	24.3333	19.3333	23.6667	NA	NA	23.3333	21	NA	27.6667	NA	NA	25	22	21.3333	19.6667	21.6667	21.3333	19	24.3333	21.3333	19.6667	24.3333	21	22.6667	23	24.3333	NA	NA	26.3333	NA	21
13	23.3333	25	NA	NA	NA	NA	22.3333	NA	NA	26.6667	27	35.6667	NA	23.3333	NA	NA	23	NA	31.6667	21.3333	25.6667	NA	NA	32.6667	22.3333	NA	38	NA	NA	29	24.6667	23.3333	21.3333	23.6667	23.6667	21	27.6667	23.3333	21.6667	26.6667	22.6667	26.3333	25.6667	28	NA	NA	30.6667	NA	22.6667
14	25.6667	28	NA	NA	NA	NA	24.6667	NA	NA	28.6667	30	NA	NA	26	NA	NA	26.3333	NA	NA	23.3333	29	NA	NA	NA	24.3333	NA	NA	NA	NA	NA	27.3333	25	23.3333	25	30	23	39.6667	25.3333	23.3333	29	24.3333	NA	28.3333	NA	NA	NA	NA	NA	24.3333
15	27.3333	NA	NA	NA	NA	NA	26.6667	NA	NA	30.3333	32.6667	NA	NA	NA	NA	NA	NA	NA	NA	25	32	NA	NA	NA	25.6667	NA	NA	NA	NA	NA	29.6667	27	25	27	NA	24.6667	NA	27.3333	25.3333	32	26	NA	32.3333	NA	NA	NA	NA	NA	26
16	29.3333	NA	NA	NA	NA	NA	29	NA	NA	33	34.6667	NA	NA	NA	NA	NA	NA	NA	NA	27.3333	NA	NA	NA	NA	28	NA	NA	NA	NA	NA	34	29	27.3333	28.6667	NA	26.6667	NA	30.3333	27.6667	34.6667	28	NA	NA	NA	NA	NA	NA	NA	28.3333
17	32.3333	NA	NA	NA	NA	NA	32.3333	NA	NA	35.3333	39.3333	NA	NA	NA	NA	NA	NA	NA	NA	29.6667	NA	NA	NA	NA	30.3333	NA	NA	NA	NA	NA	NA	31	29.3333	31	NA	29	NA	36.3333	30.3333	39.3333	30	NA	NA	NA	NA	NA	NA	NA	30.3333
18	36	NA	NA	NA	NA	NA	41.3333	NA	NA	39	NA	NA	NA	NA	NA	NA	NA	NA	NA	33.3333	NA	NA	NA	NA	34	NA	NA	NA	NA	NA	NA	33.3333	31.3333	33	NA	31.3333	NA	NA	43.6667	NA	32.6667	NA	NA	NA	NA	NA	NA	NA	34
19	43.3333	NA	NA	NA	NA	NA	NA	NA	NA	44	NA	NA	NA	NA	NA	NA	NA	NA	NA	NA	NA	NA	NA	NA	NA	NA	NA	NA	NA	NA	NA	35.6667	34.6667	35.3333	NA	34.6667	NA	NA	NA	NA	35.3333	NA	NA	NA	NA	NA	NA	NA	40.3333
20	NA	NA	NA	NA	NA	NA	NA	NA	NA	NA	NA	NA	NA	NA	NA	NA	NA	NA	NA	NA	NA	NA	NA	NA	NA	NA	NA	NA	NA	NA	NA	39.3333	37	37.6667	NA	NA	NA	NA	NA	NA	40	NA	NA	NA	NA	NA	NA	NA	NA
21	NA	NA	NA	NA	NA	NA	NA	NA	NA	NA	NA	NA	NA	NA	NA	NA	NA	NA	NA	NA	NA	NA	NA	NA	NA	NA	NA	NA	NA	NA	NA	NA	40.6667	40.3333	NA	NA	NA	NA	NA	NA	NA	NA	NA	NA	NA	NA	NA	NA	NA
22	NA	NA	NA	NA	NA	NA	NA	NA	NA	NA	NA	NA	NA	NA	NA	NA	NA	NA	NA	NA	NA	NA	NA	NA	NA	NA	NA	NA	NA	NA	NA	NA	NA	46	NA	NA	NA	NA	NA	NA	NA	NA	NA	NA	NA	NA	NA	NA	NA
23	NA	NA	NA	NA	NA	NA	NA	NA	NA	NA	NA	NA	NA	NA	NA	NA	NA	NA	NA	NA	NA	NA	NA	NA	NA	NA	NA	NA	NA	NA	NA	NA	NA	NA	NA	NA	NA	NA	NA	NA	NA	NA	NA	NA	NA	NA	NA	NA	NA
24	NA	NA	NA	NA	NA	NA	NA	NA	NA	NA	NA	NA	NA	NA	NA	NA	NA	NA	NA	NA	NA	NA	NA	NA	NA	NA	NA	NA	NA	NA	NA	NA	NA	NA	NA	NA	NA	NA	NA	NA	NA	NA	NA	NA	NA	NA	NA	NA	NA
25	NA	NA	NA	NA	NA	NA	NA	NA	NA	NA	NA	NA	NA	NA	NA	NA	NA	NA	NA	NA	NA	NA	NA	NA	NA	NA	NA	NA	NA	NA	NA	NA	NA	NA	NA	NA	NA	NA	NA	NA	NA	NA	NA	NA	NA	NA	NA	NA	NA
26	NA	NA	NA	NA	NA	NA	NA	NA	NA	NA	NA	NA	NA	NA	NA	NA	NA	NA	NA	NA	NA	NA	NA	NA	NA	NA	NA	NA	NA	NA	NA	NA	NA	NA	NA	NA	NA	NA	NA	NA	NA	NA	NA	NA	NA	NA	NA	NA	NA
27	NA	NA	NA	NA	NA	NA	NA	NA	NA	NA	NA	NA	NA	NA	NA	NA	NA	NA	NA	NA	NA	NA	NA	NA	NA	NA	NA	NA	NA	NA	NA	NA	NA	NA	NA	NA	NA	NA	NA	NA	NA	NA	NA	NA	NA	NA	NA	NA	NA
28	NA	NA	NA	NA	NA	NA	NA	NA	NA	NA	NA	NA	NA	NA	NA	NA	NA	NA	NA	NA	NA	NA	NA	NA	NA	NA	NA	NA	NA	NA	NA	NA	NA	NA	NA	NA	NA	NA	NA	NA	NA	NA	NA	NA	NA	NA	NA	NA	NA
29	NA	NA	NA	NA	NA	NA	NA	NA	NA	NA	NA	NA	NA	NA	NA	NA	NA	NA	NA	NA	NA	NA	NA	NA	NA	NA	NA	NA	NA	NA	NA	NA	NA	NA	NA	NA	NA	NA	NA	NA	NA	NA	NA	NA	NA	NA	NA	NA	NA
30	NA	NA	NA	NA	NA	NA	NA	NA	NA	NA	NA	NA	NA	NA	NA	NA	NA	NA	NA	NA	NA	NA	NA	NA	NA	NA	NA	NA	NA	NA	NA	NA	NA	NA	NA	NA	NA	NA	NA	NA	NA	NA	NA	NA	NA	NA	NA	NA	NA
31	NA	NA	NA	NA	NA	NA	NA	NA	NA	NA	NA	NA	NA	NA	NA	NA	NA	NA	NA	NA	NA	NA	NA	NA	NA	NA	NA	NA	NA	NA	NA	NA	NA	NA	NA	NA	NA	NA	NA	NA	NA	NA	NA	NA	NA	NA	NA	NA	NA
32	NA	NA	NA	NA	NA	NA	NA	NA	NA	NA	NA	NA	NA	NA	NA	NA	NA	NA	NA	NA	NA	NA	NA	NA	NA	NA	NA	NA	NA	NA	NA	NA	NA	NA	NA	NA	NA	NA	NA	NA	NA	NA	NA	NA	NA	NA	NA	NA	NA
33	NA	NA	NA	NA	NA	NA	NA	NA	NA	NA	NA	NA	NA	NA	NA	NA	NA	NA	NA	NA	NA	NA	NA	NA	NA	NA	NA	NA	NA	NA	NA	NA	NA	NA	NA	NA	NA	NA	NA	NA	NA	NA	NA	NA	NA	NA	NA	NA	NA
[truncated: 57 more columns]

## Sheet: Table e
	Experiment_7	Experiment_7	Experiment_7	Experiment_7	Experiment_7	Experiment_7	Experiment_7	Experiment_7	Experiment_7	Experiment_7	Experiment_7	Experiment_7	Experiment_7	Experiment_7	Experiment_7	Experiment_7	Experiment_7	Experiment_7	Experiment_7	Experiment_7	Experiment_7	Experiment_7	Experiment_7	Experiment_7	Experiment_7	Experiment_7	Experiment_7	Experiment_7	Experiment_7	Experiment_7	Experiment_7	Experiment_7	Experiment_7	Experiment_7	Experiment_7	Experiment_7	Experiment_7	Experiment_7	Experiment_7	Experiment_7	Experiment_7	Experiment_7	Experiment_7	Experiment_7	Experiment_7	Experiment_7	Experiment_7	Experiment_8	Experiment_8
	cell_2.1	cell_2.2	cell_2.3	cell_2.4	cell_2.5	cell_2.6	cell_2.7	cell_2.8	cell_2.9	cell_2.10	cell_2.11	cell_2.12	cell_2.13	cell_2.14	cell_2.15	cell_2.16	cell_2.17	cell_2.18	cell_2.19	cell_2.20	cell_2.21	cell_2.22	cell_2.23	cell_2.24	cell_2.25	cell_2.26	cell_2.27	cell_2.28	cell_2.29	cell_2.30	cell_2.31	cell_2.32	cell_2.33	cell_2.34	cell_2.35	cell_2.36	cell_2.37	cell_2.38	cell_2.39	cell_2.40	cell_2.41	cell_2.42	cell_2.43	cell_2.44	cell_2.45	cell_2.46	cell_2.47	cell_2.48	cell_2.49
1	121.112	99.6182	94.9276	115.589	86.524	109.174	105.528	101.769	120.462	95.0998	114.49	112.36	88.5996	91.642	111.512	94.975	91.3932	105.041	92.6297	128.989	96.0456	91.8306	84.7901	89.8324	83.5109	100.379	91.0078	112.827	92.0657	117.552	100	120.77	115.419	96.7435	110.582	110.906	91.3322	99.8068	91.2675	123.521	79.0754	122.737	107.899	116.325	104.491	98.8693	85.9527	118.296	100.189
2	105.074	87.1409	88.186	115.484	110.287	83.52	97.8551	99.8697	94.3636	109.214	90.5486	117.367	95.2574	101.917	96.288	89.3523	110.845	111.523	87.2357	102.226	93.1973	90.4411	90.9586	102.005	120.14	79.3733	112.317	111.23	96.7299	115.201	109.383	99.4087	134.728	94.7836	95.4597	122.206	96.3745	120.495	104.534	109.155	90.1012	110.084	106.107	104.122	92.1914	106.165	103.788	67.5321	54.9023
3	91.3896	72.1779	92.3418	85.7815	132.883	83.0106	88.9268	105.317	117.169	103.666	93.467	121.477	91.786	105.365	82.9341	88.7363	139.722	91.5199	89.4088	119.336	89.057	96.226	95.7267	122.123	113.821	75.408	84.7118	98.9813	85.4616	105.338	105.453	98.9203	101.551	87.6794	104.87	115.345	86.6862	132.218	98.4119	96.4383	81.9464	109.769	106.365	98.4119	110.745	106.057	93.0233	62.3434	96.4937
4	80.2179	76.2189	89.8406	103.293	95.4734	80.4093	77.5565	101.53	105.491	121.409	120.259	101.546	80.9314	105.657	82.0567	79.4098	101.038	88.4056	75.0727	100.06	85.2293	85.9619	89.7076	136.719	109.259	79.5601	83.325	88.8083	81.9892	99.6282	106.057	100.746	95.8105	91.5964	97.1836	113.901	89.498	111.763	94.5067	89.2019	86.8183	115.165	91.991	85.8051	90.5641	108.138	76.4494	60.9772	78.9808
5	77.11	83.94	70.4677	110.907	94.8903	74.9087	55.8756	86.8065	108.028	112.312	78.2216	88.8475	81.9464	93.8078	73.6895	80.2025	102.374	95.0807	63.7944	87.4908	79.1382	99.1845	91.1226	101.977	107.124	189.832	80.7245	71.5711	68.978	82.863	91.2948	89.006	91.4989	91.3996	102.442	104.864	70.3757	92.5167	94.544	67.0026	93.9973	114.599	84.3856	88.791	100.833	118.546	58.0988	57.2116	80.0971
6	69.3688	80.3774	55.9093	97.4387	84.699	72.126	57.0464	85.0753	99.8442	87.7331	86.8038	81.8198	86.9714	95.8442	75.8626	81.8708	102.694	89.4297	75.8936	89.1955	74.0522	95.5472	75.2722	106.511	99.6729	NA	77.9228	76.3127	51.5476	75.9629	66.5816	91.9582	92.0429	93.2748	99.3531	106.145	87.653	93.6894	86.6726	63.1721	89.6147	105.736	62.752	85.7049	NA	NA	61.3853	43.1799	73.9244
7	75.1966	74.9597	48.6738	80.6599	74.8385	77.0417	62.1917	87.468	107.548	91.6602	80.9988	91.0634	102.202	81.8817	72.0741	79.1574	108.361	91.2147	73.5474	86.1386	70.2682	99.231	84.8229	99.9772	102.699	NA	75.5137	83.1309	52.3048	84.5696	60.4951	86.4129	92.9859	89.5864	104.434	93.4279	90.5759	85.8015	88.2571	63.0937	76.2818	91.6675	68.2709	82.186	NA	NA	60.9106	48.1424	75.6345
8	76.4166	69.4718	42.1053	90.7828	52.3294	78.9651	65.4053	107.863	111.668	85.8051	84.637	70.1898	NA	97.0114	95.9855	83.7678	90.6242	88.1951	73.4116	83.1701	72.2463	NA	86.6716	98.5686	103.898	NA	64.793	75.7287	45.144	82.4002	69.7333	72.0249	96.9513	84.0557	94.3053	85.4543	90.9559	84.2252	79.3988	60.7083	83.7031	95.1654	71.9228	79.2959	NA	NA	57.7361	56.5331	83.8335
9	75.7615	74.4166	44.2821	94.9568	46.2675	78.095	70.7146	116.107	NA	89.4926	85.7131	72.1634	NA	81.9072	83.2521	76.4339	87.6566	83.9537	73.5711	73.7132	70.6527	NA	NA	94.5003	94.3627	NA	53.4264	72.1214	35.1359	90.2643	84.4603	64.9379	90.822	80.8539	83.7915	86.4849	83.0024	89.899	89.7031	58.3175	81.9291	99.1718	77.6139	74.5141	NA	NA	58.1207	NA	83.2608
10	76.0194	63.0582	NA	101.762	40.1181	50.272	61.4846	112.605	NA	81.1027	77.695	75.6266	NA	91.7058	93.355	88.2306	89.6748	69.2249	72.9351	83.4325	69.3023	NA	NA	87.8088	100.103	NA	47.7608	65.4281	NA	96.688	91.6875	62.2008	78.3337	86.3555	80.7719	73.1419	88.9823	83.2138	90.2725	58.6036	82.1122	93.4096	79.2284	89.632	NA	NA	73.9355	NA	73.6638
11	79.0489	64.9561	NA	105.95	NA	NA	84.9304	93.8907	NA	77.1328	85.8926	101.019	NA	78.484	NA	91.3659	82.7118	71.6905	73.2868	86.391	69.1429	NA	NA	86.8502	98.9841	NA	56.8241	74.792	NA	91.7823	91.2958	64.1716	83.0662	83.1382	87.8215	85.1573	95.3458	72.2827	86.4329	81.7687	85.1837	101.146	74.4886	70.2463	NA	NA	86.7473	NA	103.279
12	76.1588	70.6964	NA	NA	NA	NA	88.1532	106.924	NA	78.8002	82.7273	88.5878	NA	83.7541	NA	NA	90.7746	99.4588	75.1966	74.803	68.2654	NA	NA	81.4389	103.499	NA	95.1217	NA	NA	101.582	92.2424	78.4758	84.0074	89.5053	84.3974	81.9838	94.1668	84.473	83.2876	72.3674	92.7472	102.111	75.7979	85.2995	NA	NA	86.7773	NA	101.779
13	86.6762	76.8102	NA	NA	NA	NA	84.0339	NA	NA	84.2507	77.4954	100.048	NA	87.2357	NA	NA	79.6366	NA	81.202	76.9888	68.1716	NA	NA	98.934	102.517	NA	136.036	NA	NA	89.0625	94.5139	83.8079	77.4963	72.7948	94.4565	85.1254	115.049	85.3067	90.873	76.0339	80.7309	84.0566	73.5228	95.0251	NA	NA	74.7775	NA	98.9617
14	81.6257	76.9405	NA	NA	NA	NA	95.8041	NA	NA	83.8425	83.2894	NA	NA	92.6916	NA	NA	82.9541	NA	NA	89.8251	78.218	NA	NA	NA	111.546	NA	NA	NA	NA	NA	107.092	82.7874	87.9992	99.1517	118.665	91.4543	119.02	93.2347	79.7414	67.2759	74.8595	NA	78.9879	NA	NA	NA	NA	NA	98.061
15	74.1324	NA	NA	NA	NA	NA	81.0526	NA	NA	85.2603	83.5373	NA	NA	NA	NA	NA	NA	NA	NA	81.9537	68.9424	NA	NA	NA	102.785	NA	NA	NA	NA	NA	101.989	84.7874	80.4794	84.8703	NA	83.9628	NA	87.6803	82.3801	73.8025	68.1506	NA	80.915	NA	NA	NA	NA	NA	95.3708
16	73.6622	NA	NA	NA	NA	NA	83.1491	NA	NA	92.2251	73.5319	NA	NA	NA	NA	NA	NA	NA	NA	95.7176	NA	NA	NA	NA	107.818	NA	NA	NA	NA	NA	105.822	82.8184	84.7555	91.4014	NA	86.5259	NA	89.3933	79.1993	79.1647	81.8626	NA	NA	NA	NA	NA	NA	NA	114.915
17	84.8238	NA	NA	NA	NA	NA	96.6807	NA	NA	76.1551	100.312	NA	NA	NA	NA	NA	NA	NA	NA	95.9445	NA	NA	NA	NA	102.014	NA	NA	NA	NA	NA	NA	75.531	83.8434	103.299	NA	79.4635	NA	87.6356	94.2934	91.2229	67.8208	NA	NA	NA	NA	NA	NA	NA	103.186
18	96.7836	NA	NA	NA	NA	NA	101.744	NA	NA	88.8602	NA	NA	NA	NA	NA	NA	NA	NA	NA	113.009	NA	NA	NA	NA	108.162	NA	NA	NA	NA	NA	NA	80.7728	80.9204	97.3094	NA	78.1806	NA	NA	94.0028	NA	80.1851	NA	NA	NA	NA	NA	NA	NA	111.281
19	103.618	NA	NA	NA	NA	NA	NA	NA	NA	71.2422	NA	NA	NA	NA	NA	NA	NA	NA	NA	NA	NA	NA	NA	NA	NA	NA	NA	NA	NA	NA	NA	94.7071	91.5582	104.414	NA	99.2201	NA	NA	NA	NA	97.1435	NA	NA	NA	NA	NA	NA	NA	107.706
20	NA	NA	NA	NA	NA	NA	NA	NA	NA	NA	NA	NA	NA	NA	NA	NA	NA	NA	NA	NA	NA	NA	NA	NA	NA	NA	NA	NA	NA	NA	NA	95.0133	85.9127	97.6993	NA	NA	NA	NA	NA	NA	102.327	NA	NA	NA	NA	NA	NA	NA	NA
21	NA	NA	NA	NA	NA	NA	NA	NA	NA	NA	NA	NA	NA	NA	NA	NA	NA	NA	NA	NA	NA	NA	NA	NA	NA	NA	NA	NA	NA	NA	NA	NA	92.832	90.5696	NA	NA	NA	NA	NA	NA	NA	NA	NA	NA	NA	NA	NA	NA	NA
22	NA	NA	NA	NA	NA	NA	NA	NA	NA	NA	NA	NA	NA	NA	NA	NA	NA	NA	NA	NA	NA	NA	NA	NA	NA	NA	NA	NA	NA	NA	NA	NA	NA	99.9262	NA	NA	NA	NA	NA	NA	NA	NA	NA	NA	NA	NA	NA	NA	NA
23	NA	NA	NA	NA	NA	NA	NA	NA	NA	NA	NA	NA	NA	NA	NA	NA	NA	NA	NA	NA	NA	NA	NA	NA	NA	NA	NA	NA	NA	NA	NA	NA	NA	NA	NA	NA	NA	NA	NA	NA	NA	NA	NA	NA	NA	NA	NA	NA	NA
24	NA	NA	NA	NA	NA	NA	NA	NA	NA	NA	NA	NA	NA	NA	NA	NA	NA	NA	NA	NA	NA	NA	NA	NA	NA	NA	NA	NA	NA	NA	NA	NA	NA	NA	NA	NA	NA	NA	NA	NA	NA	NA	NA	NA	NA	NA	NA	NA	NA
25	NA	NA	NA	NA	NA	NA	NA	NA	NA	NA	NA	NA	NA	NA	NA	NA	NA	NA	NA	NA	NA	NA	NA	NA	NA	NA	NA	NA	NA	NA	NA	NA	NA	NA	NA	NA	NA	NA	NA	NA	NA	NA	NA	NA	NA	NA	NA	NA	NA
26	NA	NA	NA	NA	NA	NA	NA	NA	NA	NA	NA	NA	NA	NA	NA	NA	NA	NA	NA	NA	NA	NA	NA	NA	NA	NA	NA	NA	NA	NA	NA	NA	NA	NA	NA	NA	NA	NA	NA	NA	NA	NA	NA	NA	NA	NA	NA	NA	NA
27	NA	NA	NA	NA	NA	NA	NA	NA	NA	NA	NA	NA	NA	NA	NA	NA	NA	NA	NA	NA	NA	NA	NA	NA	NA	NA	NA	NA	NA	NA	NA	NA	NA	NA	NA	NA	NA	NA	NA	NA	NA	NA	NA	NA	NA	NA	NA	NA	NA
28	NA	NA	NA	NA	NA	NA	NA	NA	NA	NA	NA	NA	NA	NA	NA	NA	NA	NA	NA	NA	NA	NA	NA	NA	NA	NA	NA	NA	NA	NA	NA	NA	NA	NA	NA	NA	NA	NA	NA	NA	NA	NA	NA	NA	NA	NA	NA	NA	NA
29	NA	NA	NA	NA	NA	NA	NA	NA	NA	NA	NA	NA	NA	NA	NA	NA	NA	NA	NA	NA	NA	NA	NA	NA	NA	NA	NA	NA	NA	NA	NA	NA	NA	NA	NA	NA	NA	NA	NA	NA	NA	NA	NA	NA	NA	NA	NA	NA	NA
30	NA	NA	NA	NA	NA	NA	NA	NA	NA	NA	NA	NA	NA	NA	NA	NA	NA	NA	NA	NA	NA	NA	NA	NA	NA	NA	NA	NA	NA	NA	NA	NA	NA	NA	NA	NA	NA	NA	NA	NA	NA	NA	NA	NA	NA	NA	NA	NA	NA
31	NA	NA	NA	NA	NA	NA	NA	NA	NA	NA	NA	NA	NA	NA	NA	NA	NA	NA	NA	NA	NA	NA	NA	NA	NA	NA	NA	NA	NA	NA	NA	NA	NA	NA	NA	NA	NA	NA	NA	NA	NA	NA	NA	NA	NA	NA	NA	NA	NA
32	NA	NA	NA	NA	NA	NA	NA	NA	NA	NA	NA	NA	NA	NA	NA	NA	NA	NA	NA	NA	NA	NA	NA	NA	NA	NA	NA	NA	NA	NA	NA	NA	NA	NA	NA	NA	NA	NA	NA	NA	NA	NA	NA	NA	NA	NA	NA	NA	NA
33	NA	NA	NA	NA	NA	NA	NA	NA	NA	NA	NA	NA	NA	NA	NA	NA	NA	NA	NA	NA	NA	NA	NA	NA	NA	NA	NA	NA	NA	NA	NA	NA	NA	NA	NA	NA	NA	NA	NA	NA	NA	NA	NA	NA	NA	NA	NA	NA	NA
[truncated: 57 more columns]
